# Supplementary material for: An autocrine inflammatory forward-feedback loop after chemotherapy withdrawal facilitates the repopulation of drug-resistant breast cancer cells
Source: PubMed Central journal article supplement (PMC5550865; doi:10.1038/cddis.2017.319), 2017-07-13

**Figure S1**

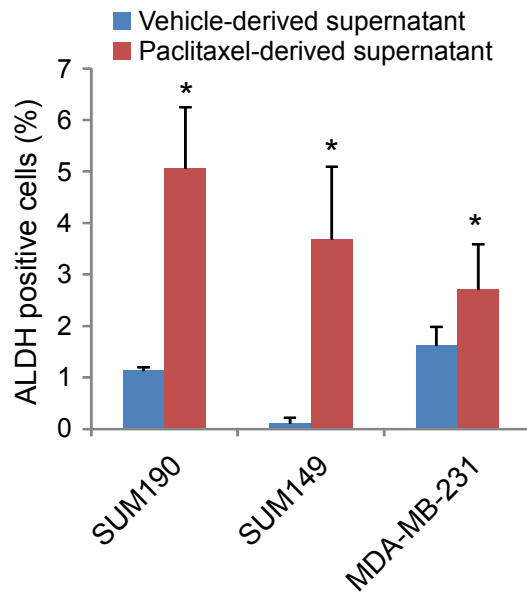

**Figure S1. Paclitaxel-derived supernatants enhance stem-like cell phenotypes (related to Figure 1).** Flow cytometric analysis of the percentage of ALDH-positive cells in SUM190, SUM149 and MDA-MB-231 breast cancer cells after exposure to vehicle-derived or paclitaxel-derived supernatants for 4 days. Pre-gated on 7-AAD-negative live cells. Data represent means  $\pm$  SD, n = 3; \* p < 0.05.

**Figure S2**

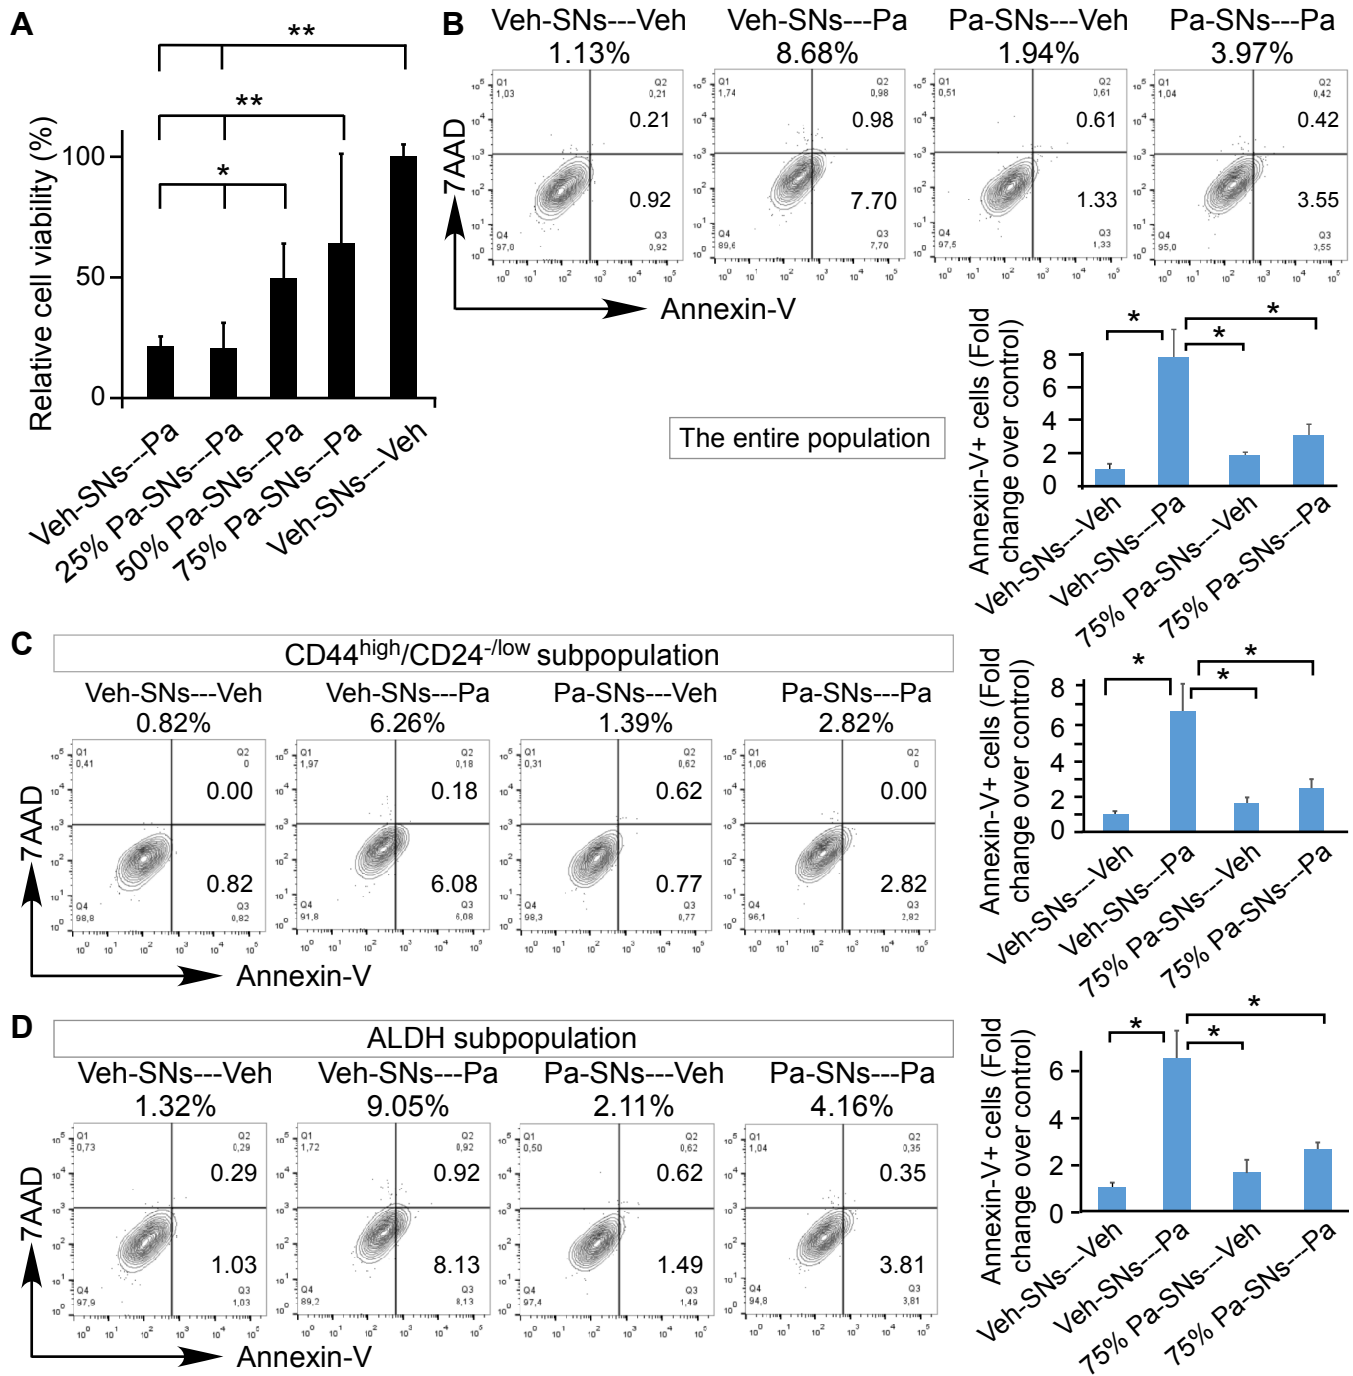

**Figure S2. Breast cancer cells become more resistant to paclitaxel treatment (related to Figure 1).** (A) SUM149 cells were cultured in the medium containing different proportions of vehicle-derived supernatants (Veh-SNs) or paclitaxel-derived supernatants (Pa-SNs) for 4 days and then treated with vehicle (Veh) or 5 nM paclitaxel (Pa) for 3 days (7 days in total). Relative cell viability was assessed by Alamar blue assay at day 7 by comparison to control group (Veh-SNs---Veh, 100% viability at day 7). (B-D) Flow cytometric analysis of apoptotic cells on the entire population (B), CD44<sup>high</sup>/CD24<sup>-low</sup> subpopulation (C), or ALDH<sup>+</sup> subpopulation (D) at day 5 after culture in the medium containing 75% of Veh-SNs or Pa-SNs for 4 days followed by treatment with Veh or 5 nM paclitaxel for 1 day (5 days in total). Cells were stained with Annexin-V and 7AAD. Cells were pre-gated on CD44<sup>high</sup>/CD24<sup>-low</sup> or ALDH<sup>+</sup> subpopulation for C or D. The contour/dot plots are all from one experiment and histograms from three independent experiments showing fold change of apoptotic cells (including early and late apoptotic cells) over the control (Veh-SNs---Veh) group. Data are means  $\pm$  SD, n = 3; \* p < 0.05.

**Figure S3**

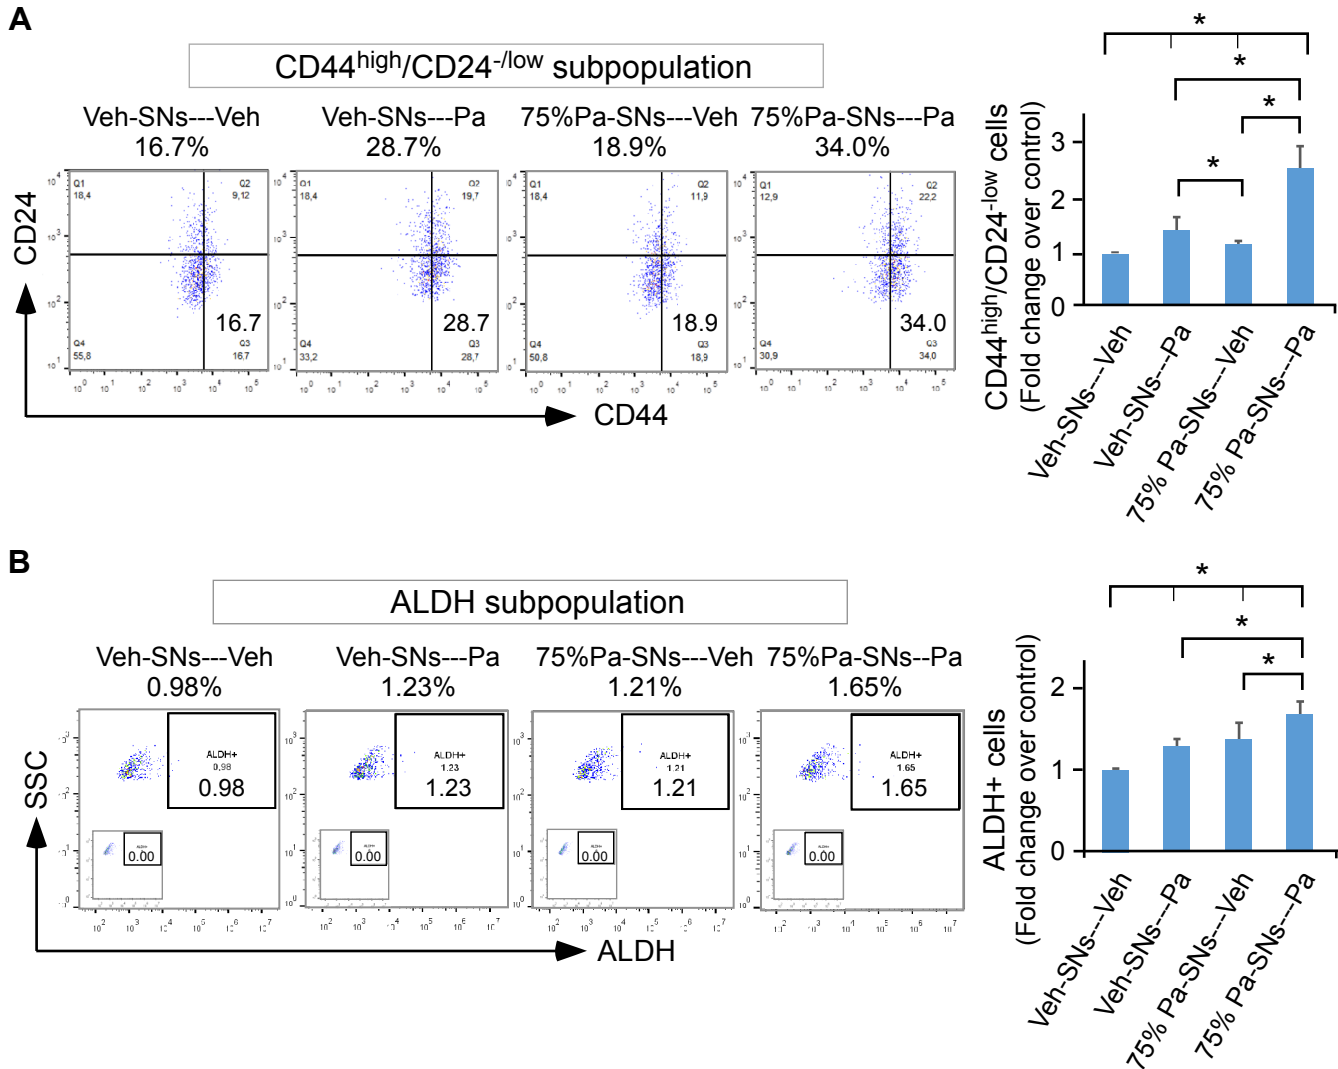

**Figure S3. Breast cancer cells become more resistant to paclitaxel treatment and enrich more CSCs after pre-exposure to paclitaxel-derived supernatants (related to Figure 1).** SUM149 cells were cultured in the medium containing 75% of vehicle-derived supernatants (Veh-SNs) or paclitaxel-derived supernatants (Pa-SNs) for 4 days and then treated with vehicle (Veh) or 5 nM paclitaxel (Pa) for 3 days. CD44<sup>high</sup>/CD24<sup>-low</sup> and ALDH<sup>+</sup> subpopulations were analyzed at day 7 by flow cytometry after different treatments. The 7AAD-negative live cells were pre-gated. The dot plots are from one representative experiment in which cells were stained either for CD44 and CD24, or ALDH markers. The insets in B show the background values of ALDH in each group. Histograms represent means  $\pm$  SD of at least three independent experiments; \*  $p < 0.05$ , \*\*  $p < 0.01$ .

**Figure S4**

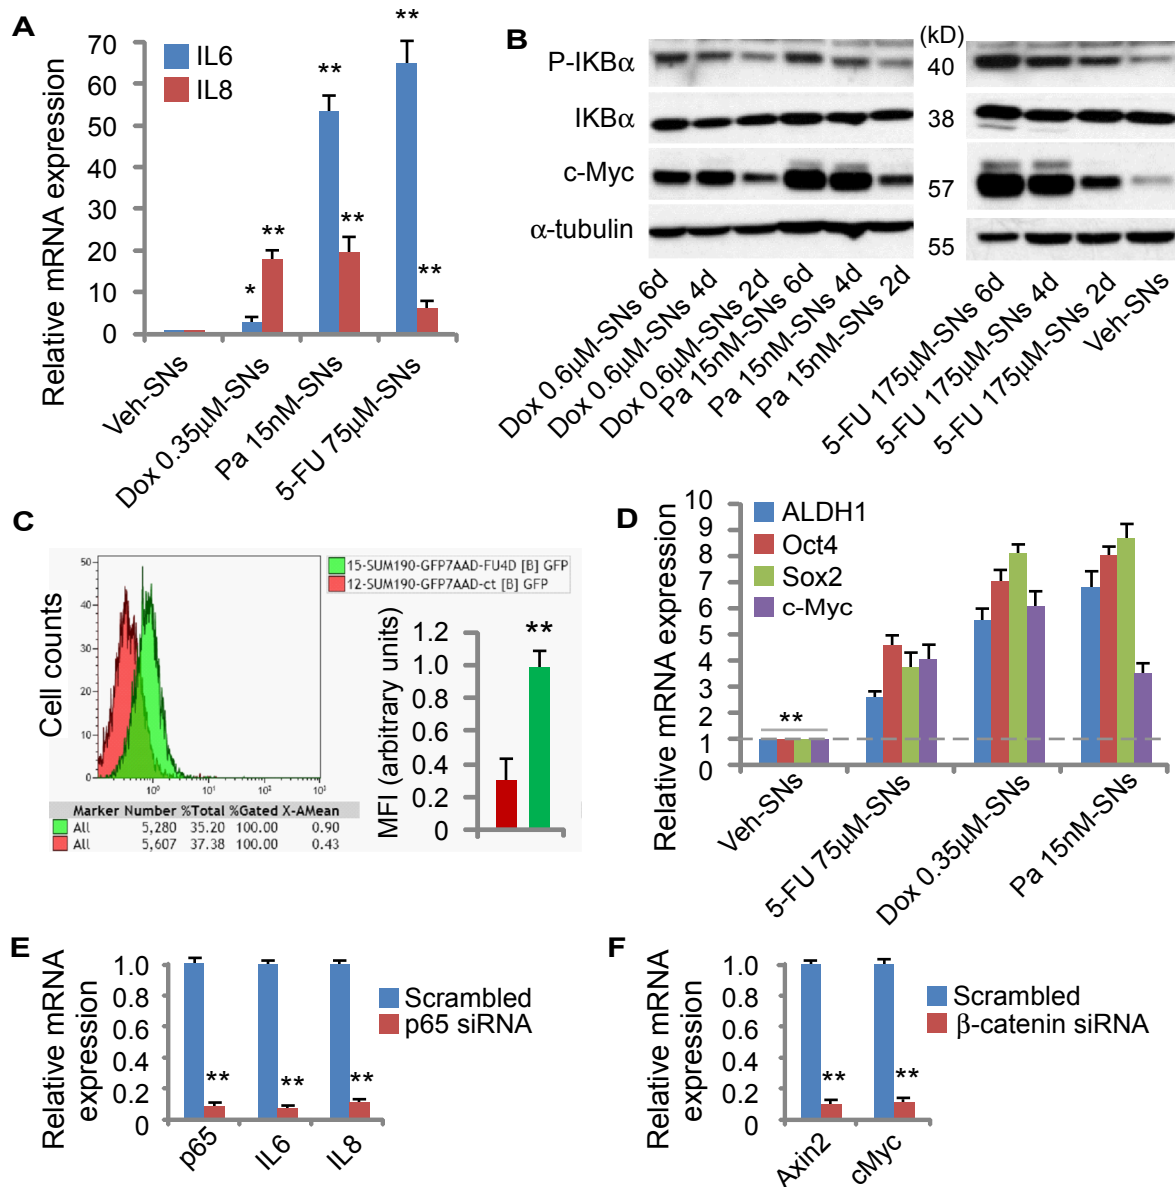

**Figure S4. An autocrine inflammatory forward-feedback loop is also observed when cells are exposed to doxorubicin and 5-fluorouracil (related to Figure 3).** (A) Similar to the cells cultured in paclitaxel-derived supernatants (Pa 15nM-SNs), SUM190 cells cultured in doxorubicin-derived supernatants (Dox 0.35 $\mu$ M-SNs) or 5-fluorouracil-derived supernatants (5-FU 75 $\mu$ M-SNs) were also capable of upregulating the gene expression of *IL8* and *IL6*. (B) Doxorubicin-derived and 5-fluorouracil-derived supernatants also enhanced IKB $\alpha$  phosphorylation (P-IKB $\alpha$ , indicating activation of NF- $\kappa$ B pathway), and upregulated the expression of stem cell-associated cMyc protein. (C) 5-fluorouracil-derived supernatant also upregulated Wnt signaling pathway. Flow cytometric analysis of 7xTCF-eGFP reporter activity in Wnt reporter subline 7xTCF-SUM190 in the presence of vehicle-derived supernatants (12-SUM190-GFP7AAD-ct, red)-derived or 5-fluorouracil-derived supernatants for 4 days (15-SUM190-GFP7AAD-FU4D, green). Live cells were pre-gated on 7-AAD negative cells (representing live cells). TCF-eGFP reporter activity was measured by the percentage of GFP positive cells and mean fluorescence intensity (MFI) after different treatments. (D) Similar to paclitaxel-derived supernatants, doxorubicin-derived and 5-fluorouracil-derived supernatants enhanced the expression of CSC-associated genes. (E and F) Knockdown efficiency of NF- $\kappa$ B (p65 siRNA) and  $\beta$ -catenin ( $\beta$ -catenin siRNA) in SUM149 cells was confirmed by significant downregulation of target genes. Data represent means  $\pm$  SD, n = 3; \*  $p$  < 0.05, \*\*  $p$  < 0.01 between control and treated groups.

**Figure S5**

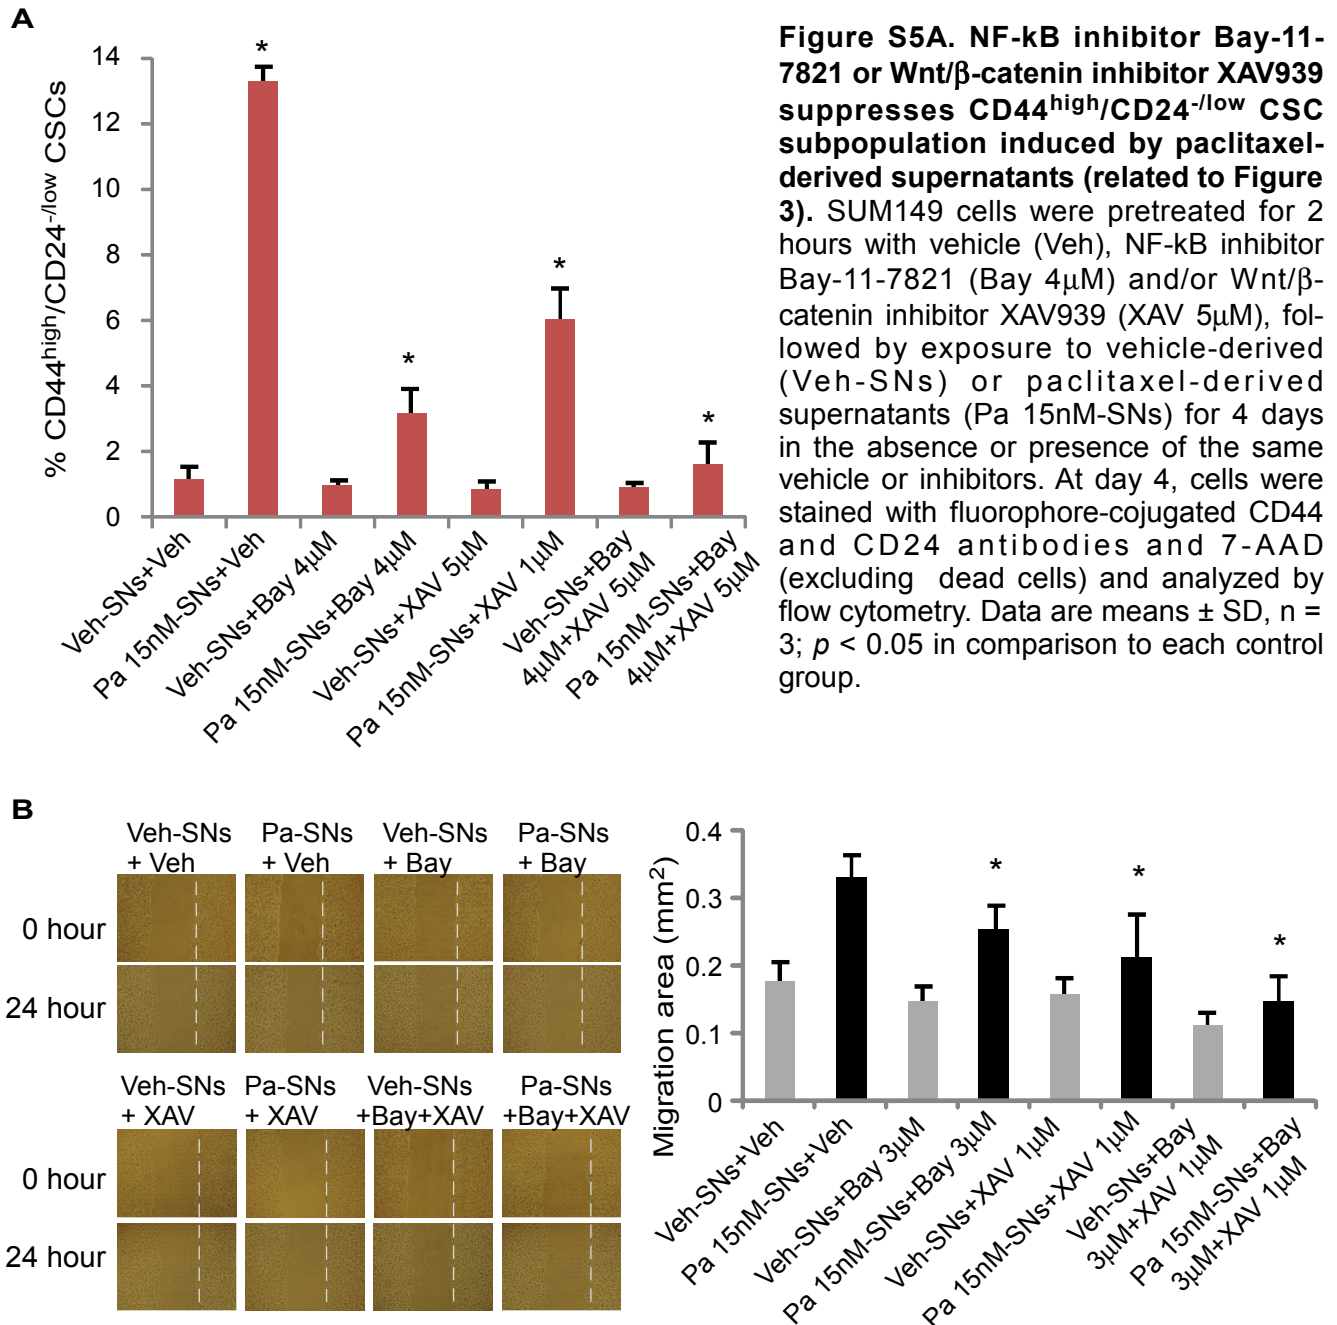

Supplement: cddis2017319x2.pdf [file cddis2017319x2.pdf]
